# Supplementary material for: Expression of zinc and cadmium responsive genes in leaves of willow (Salix caprea L.) genotypes with different accumulation characteristics
Source: PubMed Central journal article supplement — Environ Pollut. 2013 Jul;178:121–7. doi: 10.1016/j.envpol.2013.02.033 (PMC3675671; doi:10.1016/j.envpol.2013.02.033), 2013-07
Supplement: mmc1.pdf [file mmc1.pdf]

**Supplementary Table S1.** Primers used for qRT PCR and screening of SSH library

| <b>Gene name</b>                                                        | <b>Primer pair F/R (5'-3')</b>                                      |
|-------------------------------------------------------------------------|---------------------------------------------------------------------|
| <b>Reference gene</b>                                                   |                                                                     |
| Actin ( <i>ScACT</i> )<br>(JS807771)                                    | F 5'-GAGAGGTTACATGTTCACCAC-3'<br>R 5'-CTGATATCCACATCACACTTC-3'      |
| <b>Candidate genes<sup>a</sup></b>                                      |                                                                     |
| $\gamma$ -glutamylcysteine synthetase ( <i>ScCAD2</i> )<br>(JS807772)   | F 5'-GAYATGACAGCTGACTGGAC-3'<br>R 5'-TGTCCCCAYTYTCCATKGT-3'         |
| Heavy metal translocating<br>P-type ATPase ( <i>ScHMA1</i> ) (JS807773) | F 5'-GCATTAGCWRMWGCTGATATTGG-3'<br>R 5'-CATCWGCAAGAACRGCTGCCCAA-3'  |
| Metallothionein ( <i>ScMT2B</i> ) (JS807774)                            | F 5'-TGCAAGAKGTACCCTGACHTG-3'<br>R 5'-TCATTTTRCARGTGCADGGRTRGCA-3'  |
| Metallothionein ( <i>ScMT3</i> ) (JS807775)                             | F 5'-ATGTCTAGCAMCTGCCRCA-3'<br>R 5'-GTGCAGKTRGTGCARGTGCA-3'         |
| Metal tolerance protein ( <i>ScMTP1</i> ) (JS807776)                    | F 5'-CTGGTGAACATCATAATGGCT-3'<br>R 5'-GCAGATCAGATCAATTATCTTCC-3'    |
| O-acetylserine lyase ( <i>ScOAS1</i> ) (JS807777)                       | F 5'-AGAGTGCCTGATTGAGCC-3'<br>R 5'-GCACTTTCAACCGTTCTAC-3'           |
| Phytochelatin synthase 1 ( <i>ScPCSI</i> ) (JS807778)                   | F 5'-TGTMRGGAAACWTGYGTGAAATG-3'<br>R 5'-GAAGGAACCAGCACATCAA-3'      |
| Phytochelatin synthase 2 ( <i>ScPCS2</i> ) (JS807779)                   | F 5'-TGTMRGGAAACWTGYGTGAAATG-3'<br>R 5'-TCTTTGATMCCWGACCACGT-3'     |
| Serine-o-acetyl transferase ( <i>ScSAT1</i> ) (JS807780)                | F 5'-GACGGWGTGTTGATTGGAGC-3'<br>R 5'-ATATAATCTGACCATCVGAKATA-3'     |
| Zrt-Irt-like protein ( <i>ScZIP6</i> ) (JS807781)                       | F 5'-GGCTCTGTTGGTTGATTTA-3'<br>R 5'-GCAATGCAGCCGCCAAGA-3'           |
| <b>SSH library genes<sup>b</sup></b>                                    |                                                                     |
| Cell wall-associated kinase-like ( <i>ScWAKL1</i> )                     | F 5'-CAAGGGACTTTAGGCTACTTGG-3'<br>R 5'-TCCCCTAACAAAGTATCCGTCT-3'    |
| Heavy metal-associated domain-containing protein<br>( <i>ScHMAD1</i> )  | F 5'-ACAAAATACTGCTATACCCAC-3'<br>R 5'-CTTGATGTCGTAGCCTTCTC-3'-3'    |
| Metallothionein ( <i>ScMT2A</i> )                                       | F 5'-ACATACCCGCATCCATTGC-3'<br>R 5'-TCAGTTTCCAAGTAAAATCCC-3'        |
| Mitochondrial copper transporter ( <i>ScMCT1</i> )                      | F 5'-CAAAAAATAGTGCTCAGGGTGCAG-3'<br>R 5'-TGCCCAACTTTCTTCTCAACCT-3'  |
| Pectin methylesterase ( <i>ScPME1</i> )                                 | F 5'-TGTCCAGACATGGCTTAGCGCT-3'<br>R 5'-CTCCCATCCCTGGCCACCAC-3'      |
| Polyphenol oxidase ( <i>ScPPO3</i> )                                    | F 5'-GATTGGCTTAATGCCTCATTC-3'<br>R 5'-CTGCTTTTTGCTTCTCGATTTC-3'     |
| Predicted expressed membrane protein ( <i>ScPMP1</i> )                  | F 5'-GCCAACAATAGCAGAAAGGATAG-3'<br>R 5'-CTCAGGGTTTCACTAAGTCGCT-3'   |
| Rapid alkalisation factor-like<br>( <i>ScRALFL1</i> ) <sup>c</sup>      | F 5'-TCAGCGATATTGCGTGGCTCCAC-3'<br>R 5'-TCAAGATCCACTCGATCCAGC-3'    |
| Thaumatococin/Osmotin-like protein 21 ( <i>ScTOL21</i> )                | F 5'-GACCCTGTACCGCTACCATCG-3'<br>R 5'-AGGCAGCCAACCTTGAAATCC-3'      |
| Thylakoid membrane phosphoprotein ( <i>ScTMP14</i> )                    | F 5'-GAAGATAGCTCGCAATGTTATG-3'<br>R 5'-CAATCTCAAAAACCCAGGAATC-3'    |
| <b>Primers for differential screening</b>                               |                                                                     |
| M13                                                                     | F 5'-GTAAAACGACGGCCAGT-3' <sup>d</sup><br>R 5'-CAGGAAACAGCTATGAC-3' |

<sup>a</sup> Primers were designed as degenerate using D=A/G/T; H=A/C/T; K=G/T; M=A/C; R=A/G; V=A/C/G; W=A/T; Y=C/T

<sup>b</sup> Primers specific for the *S. caprea* genes identified in the SSH library screening

<sup>c</sup> Reverse primer located in 3'UTR region which was obtained by 3'RACE from the initial SSH library fragment

<sup>d</sup> M13-F was used for sequencing the inserts of the selected clones







|     |          |          |                  |              |                |                                                           |                                       |                                                                                        |
|-----|----------|----------|------------------|--------------|----------------|-----------------------------------------------------------|---------------------------------------|----------------------------------------------------------------------------------------|
| 221 | G-1-H10a | JK747703 | POPTR_0012s07620 | scaffold 12  | AC216684.1     |                                                           | Regulation of transcription           | MOT2 transcription factor; contains Zinc finger, C3HC4 type (RING finger)              |
| 222 | G-1-H10b | JK747704 | POPTR_0013s12890 | scaffold 13  | AC213156.1     |                                                           | Unknown                               | Unknown                                                                                |
| 223 | G-1-H12  | JK747705 | POPTR_0004s22900 | scaffold 4   | AC216689.1     |                                                           | Regulation of protein metabolism      | Ubiquitin family protein                                                               |
| 224 | G-2-A2   | JK747706 | POPTR_0016s01720 | scaffold 16  | XM_002338972.1 |                                                           | Development                           | Protease inhibitor/seed storage/lipid transfer protein family                          |
| 225 | G-2-B3   | JK747707 | POPTR_0006s04560 | scaffold 6   | EF147170.1     |                                                           | Methane metabolism                    | Esterase D                                                                             |
| 226 | G-2-C3   | JK747708 | POPTR_0010s06190 | scaffold 10  | EF148588.1     |                                                           | Photosynthesis                        | Photosystem II core complex protein psbY                                               |
| 227 | G-2-C9   | JK747709 | POPTR_0003s19210 | scaffold 3   | XM_002336095.1 |                                                           | Photosynthesis                        | Protein rich family protein                                                            |
| 228 | G-2-D3a  | JK747710 | POPTR_0200s00220 | scaffold 200 | AC182663.2     |                                                           | Kinase activity (molecular function)  | Serine/threonine protein kinase                                                        |
| 229 | G-2-D3b  | JK747711 | POPTR_0008s13180 | scaffold 8   | XM_002311481.1 |                                                           | Carbohydrate metabolism               | Phosphohexomutase                                                                      |
| 230 | G-2-D4   | JK747712 | POPTR_0017s01640 | scaffold 17  | XM_002305206.1 |                                                           | Disease resistance                    | Expressed protein in <i>A. thaliana</i> (At4g25690, At5g52550, At4g25670)              |
| 231 | G-2-D8   | JK747713 | POPTR_0001s27320 | scaffold 1   | XM_002298396.1 |                                                           | Cell wall modification                | Cellulose synthase                                                                     |
| 232 | G-2-E7   | JK747714 | POPTR_0006s28640 | scaffold 6   | XM_002309666.1 |                                                           | Disease resistance                    | CC-NBS-LRR Resistance Protein                                                          |
| 233 | G-2-E8   | JK747715 | POPTR_0005s13330 | scaffold 5   | XM_002307255.1 |                                                           | Kinase activity (molecular function)  | Serine/threonine protein kinase, Pto-like kinase                                       |
| 234 | G-2-F7   | JK747716 | POPTR_0004s04630 | scaffold 4   | XM_002305882.1 |                                                           | Oxidation-reduction process           | Microsomal glutathione s-transferase                                                   |
| 235 | G-2-F8   | JK747717 | POPTR_0015s11500 | scaffold 15  | XM_002321704.1 |                                                           | Lipid metabolic process               | Serine palmitoyltransferase                                                            |
| 236 | G-2-H1   | JK747718 | POPTR_0017s04300 | scaffold 7   | XM_002323670.1 |                                                           | Unknown                               | Expressed protein                                                                      |
| 237 | G-2-H4   | JK747719 | POPTR_0001s12390 | scaffold 1   | -              |                                                           | Unknown                               | Endomembrane-associated protein                                                        |
| 238 | G-2-H12  | JK747720 | POPTR_0001s41780 | scaffold 1   | XM_002330356.1 | M-11-C10, M-12-E2, M-13-E9, M-16-F2                       | Photosynthesis                        | Chlorophyll A-B binding protein (Lhcb3)                                                |
| 239 | G-3-A2   | JK747721 | POPTR_0002s22220 | scaffold 2   | XM_002301546.1 | M-15-D9, C-5-D5, C-5-E7, C-6-A4, G-3-F10                  | Photosynthesis                        | Chlorophyll A-B binding protein Lhcb2-2                                                |
| 240 | G-3-B2   | JK747722 | POPTR_0010s14740 | scaffold 10  | XM_002314878.1 |                                                           | Regulation of transcription           | Basic helix-loop-helix (bHLH) family protein                                           |
| 241 | G-3-B3   | JK747723 | POPTR_0003s16160 | scaffold 3   | XM_002333900.1 |                                                           | no hit                                | Unknown                                                                                |
| 242 | G-3-C2   | JK747724 | POPTR_0006s01060 | scaffold 6   | XM_002307833.1 |                                                           | Photosynthesis                        | Plastocyanin-like Protein                                                              |
| 243 | G-3-C5   | JK747725 | POPTR_0002s24070 | scaffold 2   | XM_002302988.1 | M-E-A5                                                    | Photosynthesis                        | Photosystem I reaction center subunit XI                                               |
| 244 | G-3-C11  | JK747726 | POPTR_0001s09570 | scaffold 1   | XM_002299511.1 | C-2-C9                                                    | Disease resistance                    | Thaumatin family protein                                                               |
| 245 | G-3-D11  | JK747727 | POPTR_0005s26040 | scaffold 5   | XM_002307686.1 |                                                           | Development                           | Gibberellin-regulated protein (GASA family)                                            |
| 246 | G-3-E2   | JK747728 | POPTR_0001s14310 | scaffold 1   | XM_002299246.1 | M-12-G6, G-1-A7                                           | Secondary metabolism                  | Naringenin chalcone synthase                                                           |
| 247 | G-3-E10  | JK747729 | POPTR_0008s15060 | scaffold 10  | XM_002311580.1 |                                                           | Circadian rhythm                      | Expressed protein                                                                      |
| 248 | G-3-F7   | JK747730 | POPTR_0007s13810 | scaffold 7   | XM_002333293.1 | M-16-A10                                                  | Regulation of protein metabolism      | Serine Carboxypeptidase                                                                |
| 249 | G-3-F10  | JK747731 | POPTR_0002s22220 | scaffold 2   | XM_002301546.1 | M-15-D9, C-5-D5, C-5-E7, C-6-A4, G-3-A2                   | Photosynthesis                        | Chlorophyll A-B binding protein Lhcb2-2                                                |
| 250 | G-3-G7   | JK747732 | -                | -            | AC210554.1     |                                                           | no hit                                | Unknown                                                                                |
| 251 | G-3-H3   | JK747733 | POPTR_0001s15740 | scaffold 1   | CT028217.1     |                                                           | Nucleic acid metabolic process (RNA)  | RNA binding protein                                                                    |
| 252 | G-3-H5a  | JK747734 | POPTR_0018s12810 | scaffold 18  | XM_002324605.1 |                                                           | Protein binding                       | WD-40 repeat family protein                                                            |
| 253 | G-3-H5b  | JK747735 | POPTR_0016s11610 | scaffold 16  | XM_002322910.1 |                                                           | Carbohydrate metabolism               | Fructose 1,6 bisphosphatase                                                            |
| 254 | G-3-H10  | JK747736 | POPTR_0004s09910 | scaffold 4   | CT029820.1     | M-E-A7, MT-B-2, MT-B-3, M-E-B11, M-2-D6, M-14-A7, M-16-D9 | Carbon fixation                       | Rubisco                                                                                |
| 255 | G-4-B4   | JK747737 | POPTR_0009s04850 | scaffold 9   | XM_002314080.1 |                                                           | Regulation of transcription           | Zn-finger (C2H2 type) family protein                                                   |
| 256 | G-4-C2   | JK747738 | POPTR_0014s07950 | scaffold 14  | XM_002320758.1 | M-19-E10                                                  | Carbohydrate metabolism               | Glycosyl hydrolase family 14                                                           |
| 257 | G-4-C8   | JK747739 | POPTR_0006s03720 | scaffold 6   | XM_002307936.1 |                                                           | Regulation of transcription           | hZIP transcription factor                                                              |
| 258 | G-4-D3a  | JK747740 | POPTR_0013s07230 | scaffold 13  | XM_002319730.1 |                                                           | Other catalytic activity              | Transferase                                                                            |
| 259 | G-4-D3b  | JK747741 | POPTR_0013s10350 | scaffold 13  | XM_002327260.1 |                                                           | Other catalytic activity              | Phosphorylase                                                                          |
| 260 | G-4-D5   | JK747742 | POPTR_0015s10100 | scaffold 16  | XM_002334150.1 |                                                           | Oxidation-reduction process           | NADPH-dependent oxidoreductase                                                         |
| 261 | G-4-D10  | JK747743 | POPTR_0018s01390 | scaffold 18  | XM_002324244.1 |                                                           | Unknown                               | Expressed protein                                                                      |
| 262 | G-4-E2a  | JK747744 | POPTR_0004s09910 | scaffold 4   | CU228156.1     |                                                           | Carbon fixation                       | Rubisco                                                                                |
| 263 | G-4-E2b  | JK747745 | -                | -            | -              |                                                           | no hit                                | Mitochondrial DNA                                                                      |
| 264 | G-4-E3   | JK747746 | POPTR_0006s28350 | scaffold 6   | EF489041.1     |                                                           | Regulation of transcription           | CONSTANS-like protein 2, GATA-4/5/6 transcription factors                              |
| 265 | G-4-E11a | JK747747 | POPTR_0001s42970 | scaffold 1   | XM_002316979.1 |                                                           | Photosynthesis and unknown            | Photosystem II 10 kDa polypeptide                                                      |
| 266 | G-4-E11b | JK747748 | POPTR_0001s02570 | scaffold 1   | XM_002326482.1 |                                                           | Unknown                               | Expressed protein                                                                      |
| 267 | G-4-F4   | JK747749 | POPTR_0019s03150 | scaffold 19  | XM_002325285.1 | G-4-H4                                                    | Lipid metabolic process               | Ca-independent phospholipase A2                                                        |
| 268 | G-4-G6   | JK747750 | POPTR_0274s00200 | scaffold 274 | XM_002301507.1 |                                                           | Amino acid metabolism                 | S-Adenosylmethionine synthetase                                                        |
| 269 | G-4-G8a  | JK747751 | POPTR_0007s12060 | scaffold 7   | XM_002310151.1 |                                                           | Resistance to abiotic stress          | Cold acclimation WCOR413-like protein (stress-responsive protein in <i>O. sativa</i> ) |
| 270 | G-4-G8b  | JK747752 | POPTR_0019s14100 | scaffold 19  | XM_002325648.1 |                                                           | Photosynthesis                        | Photosynthetic electron transfer c (plastoquinol-plastocyanin reductase)               |
| 271 | G-4-G12  | JK747753 | POPTR_0003s02140 | scaffold 3   | XM_002327366.1 |                                                           | Unknown                               | Expressed protein in <i>A. thaliana</i> (At1g15780, At1g15770)                         |
| 272 | G-4-H1   | JK747754 | POPTR_0013s01640 | scaffold 13  | EF148733.1     |                                                           | Development                           | Dormancy/auxin associated family protein                                               |
| 273 | G-4-H4   | JK747755 | POPTR_0001s25760 | scaffold 1   | XM_002299778.1 | G-4-F4                                                    | Lipid metabolic process               | Phospholipase                                                                          |
| 274 | G-5-A6   | JK747756 | POPTR_0015s06060 | scaffold 15  | EF147148.1     | G-5-D8                                                    | Regulation of protein metabolism      | Ubiquitin conjugating enzyme E2                                                        |
| 275 | G-5-D1   | JK747757 | POPTR_0015s11580 | scaffold 15  | XM_002321706.1 |                                                           | Other catalytic activity              | Acyl carrier Zn finger protein                                                         |
| 276 | G-5-D8   | JK747758 | POPTR_0004s18090 | scaffold 4   | XM_002305483.1 | G-5-A6                                                    | Regulation of protein metabolism      | Ubiquitin conjugating enzyme E2                                                        |
| 277 | G-5-E1   | JK747759 | POPTR_0004s08380 | scaffold 4   | XM_002305849.1 | C-3-D9                                                    | Cellular nitrogen compound metabolism | Glutamine synthetase                                                                   |
| 278 | G-5-E5   | JK747760 | POPTR_0001s06710 | scaffold 1   | EF145750.1     |                                                           | Energy homeostasis                    | NADH dehydrogenase                                                                     |
| 279 | G-5-E12  | JK747761 | POPTR_0018s12260 | scaffold 18  | XM_002308339.1 |                                                           | Regulation of protein metabolism      | Ring finger and protease associated domain-containing                                  |
| 280 | G-5-F1   | JK747762 | POPTR_0001s24840 | scaffold 1   | XM_002299832.1 |                                                           | Regulation of transcription           | MYB transcription factor                                                               |
| 281 | G-5-F5a  | JK747763 | POPTR_0003s09830 | scaffold 3   | CU225687.1     |                                                           | Photosynthesis                        | Phosphoribulokinase                                                                    |
| 282 | G-5-F5b  | JK747764 | POPTR_0005s23590 | scaffold 5   | CT029295.1     |                                                           | Kinase activity                       | Chlorophyllase                                                                         |
| 283 | G-5-F9a  | JK747765 | POPTR_0001s25410 | scaffold 1   | XM_002298294.1 |                                                           | Cytoskeleton organization             | Tubulin beta chain                                                                     |
| 284 | G-5-F9b  | JK747766 | POPTR_0008s04590 | scaffold 8   | XM_002311086.1 |                                                           | Energy homeostasis                    | Adenylate kinase                                                                       |
| 285 | G-5-G5   | JK747767 | POPTR_0014s13710 | scaffold 14  | AC208048.1     |                                                           | Energy homeostasis                    | Acyl-CoA synthetase                                                                    |
| 286 | G-5-G7   | JK747768 | POPTR_0002s04410 | scaffold 2   | XM_002302033.1 |                                                           | Nucleic acid metabolic process (DNA)  | Histone H1                                                                             |
| 287 | G-5-H10  | JK747769 | POPTR_0016s12090 | scaffold 1   | XM_002323530.1 |                                                           | Signaling                             | Histidine-containing phosphotransfer protein                                           |

**Supplementary Table S3.** Genes from the SSH screening selected for qPCR.

| Accession No.<br>(NCBI) | Gene                                                 | Gene name       | Biological process and/or<br>molecular function | Best hit in<br><i>P. trichocarpa</i> <sup>a</sup> | Best hit in NCBI<br>tBLASTx <sup>a</sup> | Found in<br>library |
|-------------------------|------------------------------------------------------|-----------------|-------------------------------------------------|---------------------------------------------------|------------------------------------------|---------------------|
| JK747484                | Cell wall-associated kinase-like                     | <i>ScWAKL1</i>  | Kinase activity                                 | POPTR_0004s20330<br>(88 %, E = 2e-142)            | XM_002325658.1<br>(100 %, E = 2e-64)     | 1                   |
| JK747700                | Heavy metal-associated domain-<br>containing protein | <i>ScHMAD1</i>  | Metal ion transport                             | POPTR_0016s00850<br>(75 %, E = 9e-29)             | EF147807.1<br>(72 %, E = 4e-22)          | 1                   |
| JK747640                | Metallothionein MT2A                                 | <i>ScMT2A</i>   | Metal ion transport                             | POPTR_0001s24660<br>(83 %, E = 5e-38)             | XM_002299837.1<br>(84 %, E = 4e-43)      | 1                   |
| JK747577                | Mitochondrial copper transporter                     | <i>ScMCT1</i>   | Metal ion transport                             | POPTR_0006s00390<br>(84 %, E = 9e-30)             | XM_002307806.1<br>(81 %, E = 1e-57)      | 1                   |
| JK747496                | Pectin methylesterase                                | <i>ScPME1</i>   | Cell wall modification                          | POPTR_0014s14720<br>(85 %, E = 0)                 | CU224046.1<br>(85 %, E = 5e-86)          | 4                   |
| JK747507                | Polyphenol oxidase                                   | <i>ScPPO3</i>   | Oxidation-reduction process                     | POPTR_0011s04710<br>(92 %, E = 0)                 | XM_002316596.1<br>(92 %, E = 0)          | 2                   |
| JK747629                | Predicted transmembrane protein                      | <i>ScPMP1</i>   | Unknown                                         | POPTR_0019s13860<br>(86 %, E = 1e-86)             | XM_002314845.1<br>(92 %, E = 9e-117)     | 1                   |
| JK747486                | Rapid alkalization factor-like                       | <i>ScRALFL1</i> | Signaling                                       | POPTR_0125s00200<br>(81 %, E = 1e-80)             | EF148634.1<br>(93 %, E = 2e-30)          | 120                 |
| JK747627                | Thaumatococcus/Osmotin-like protein                  | <i>ScTOL21</i>  | Disease resistance                              | POPTR_0001s09030<br>(89 %, E = 3e-108)            | XM_002299511.1<br>(90 %, E = 6e-95)      | 2                   |
| JK747523                | Thylakoid membrane phosphoprotein                    | <i>ScTMP14</i>  | Photosynthesis                                  | POPTR_0014s10200<br>(92 %, E = 4e-76)             | XM_002320200.1<br>(93 %, E = 0)          | 10                  |

<sup>a</sup> Values in brackets represent % homology and expectation value
